# Supplementary material for: Increased Risk of Liver-Related Outcomes in Chronic Hepatitis B Patients with Metabolic Syndrome: A Systematic Review and Meta-Analysis
Source: PubMed Central journal article supplement — Dig Dis. 2022 Jan 5;40(6):745–53. doi: 10.1159/000521768 (PMC9808743; doi:10.1159/000521768), 2022-01-05
Supplement: ddi-0040-0745-s03.pdf [file ddi-0040-0745-s03.pdf]

## Supplemental Figures

**Supplemental Figure 1a.** Funnel plot for publication bias for included studies in overall analysis

**Supplemental Figure 1b.** Funnel plot for included studies in subgroup analysis

Supplemental Figure 1A. Funnel plot for publication bias for all studies in the meta-analysis

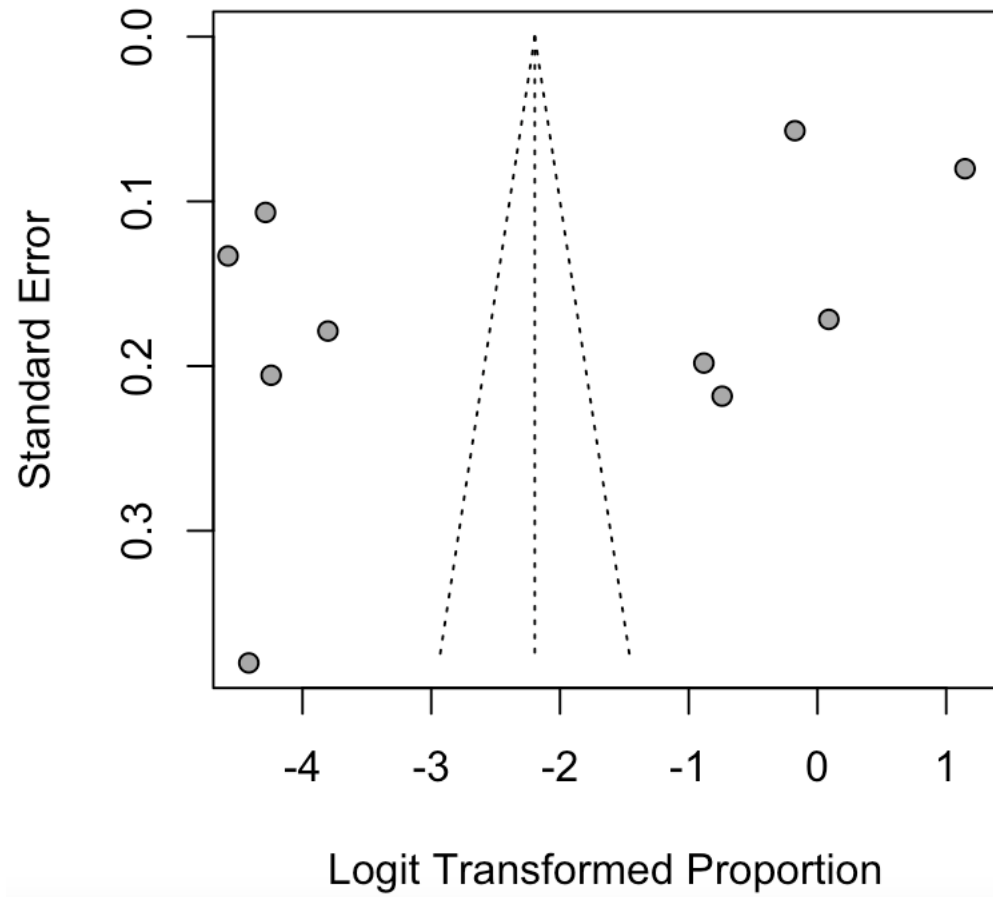

$P$ -value = 0.14

Supplemental Figure 1B. Funnel plot for subgroup analysis

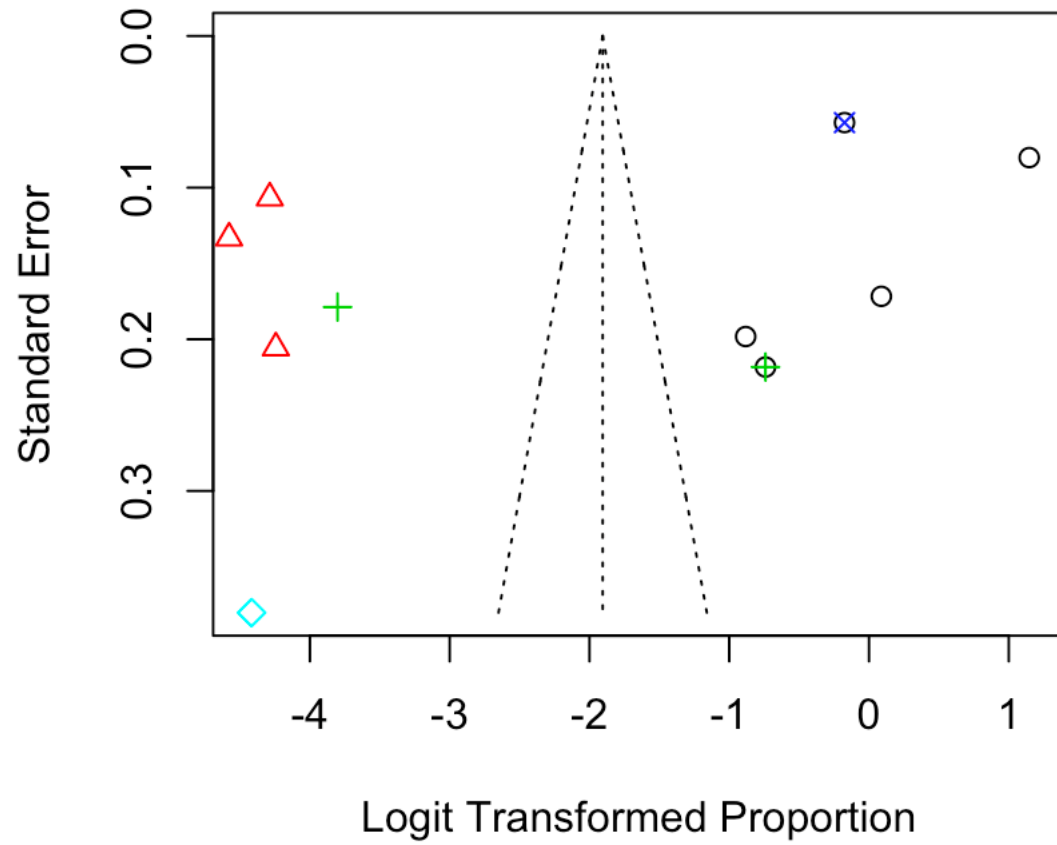

$P$ -value = 0.093
